# Supplementary material
Source: Research Square preprint supplement (doi:10.21203/rs.3.rs-9328913/v1)

**SUPPLEMENTARY MATERIAL**

1. **Figures**


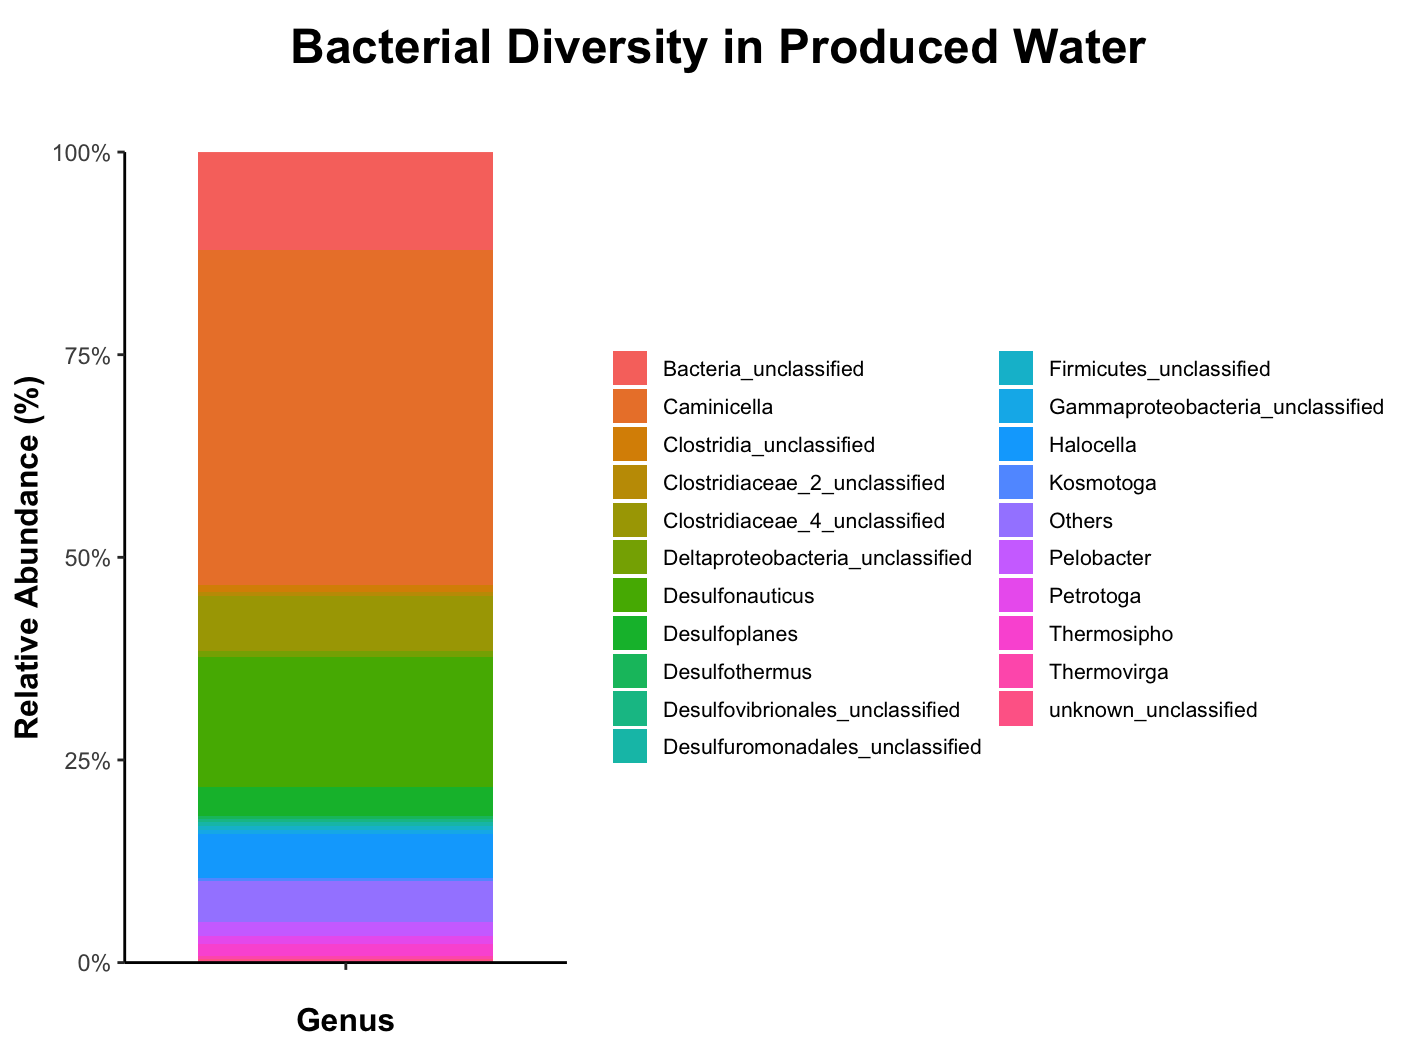


**Figure 1:** Relative abundance of bacterial genera identified in the produced water sample based on 16S rDNA sequencing. The figure shows the taxonomic composition at the genus level, highlighting the predominance of Firmicutes and Proteobacteria phyla. Genera such as Caminicella, Desulfonauticus, Desulfoplanes, and Halanaerobium were among the most abundant, suggesting potential microbial contribution to the biocorrosion observed in the system.


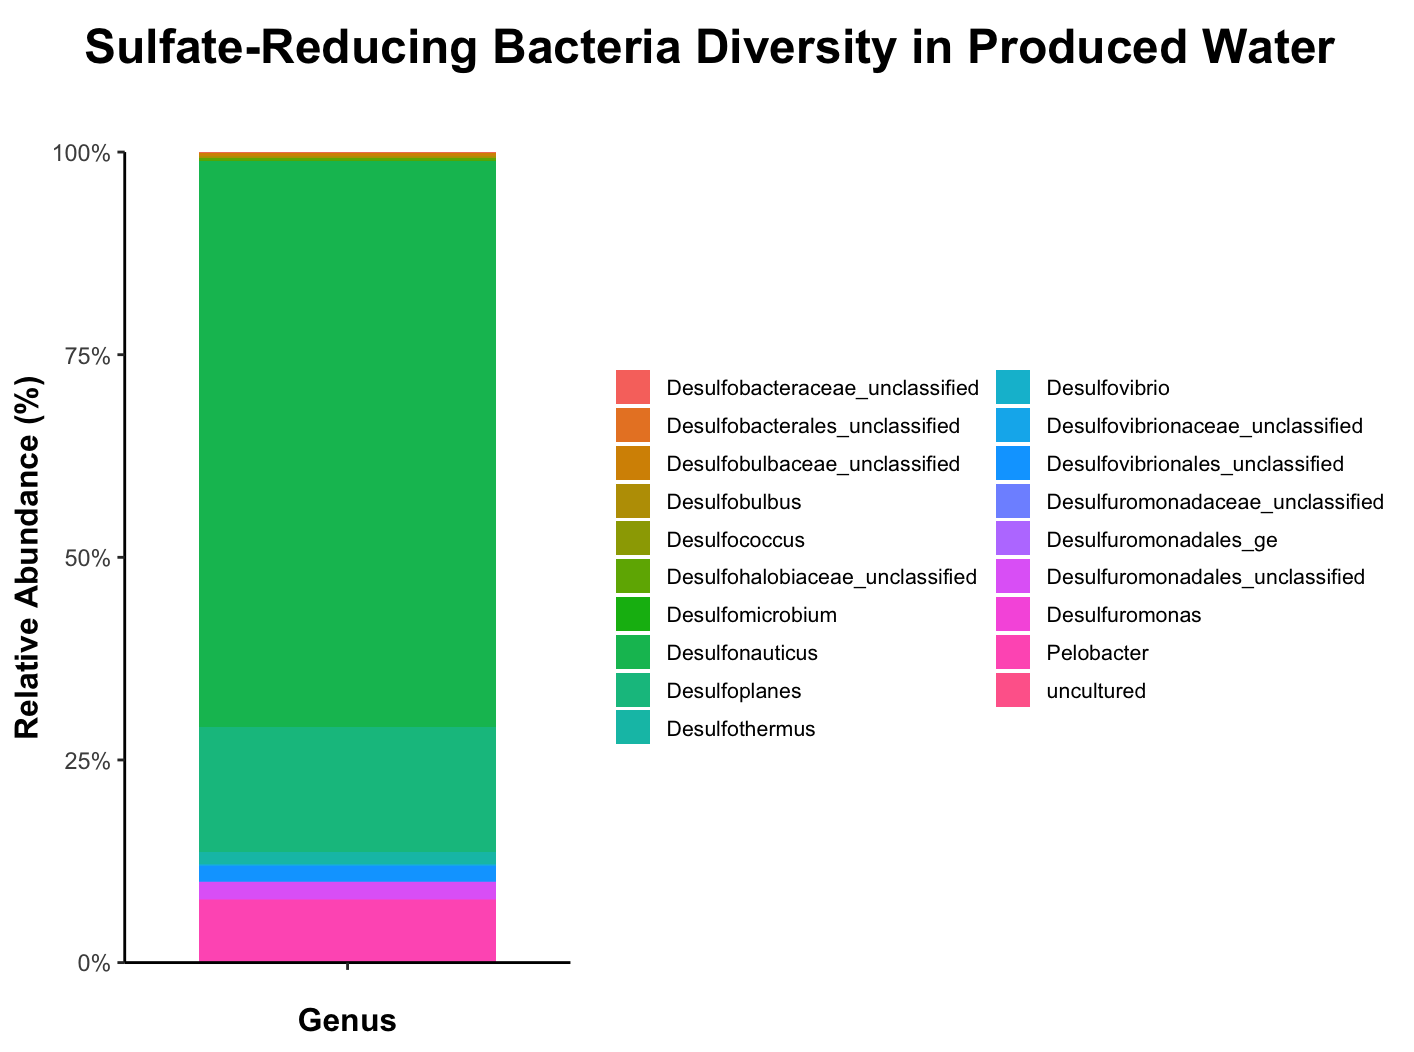


**Figure 2:** Relative abundance of Sulfate-reducing bacteria (SRB) genera identified in the produced water sample. SRB taxa were filtered from the overall dataset to highlight key genera implicated in microbiologically influenced corrosion (MIC). Desulfonauticus, Desulfoplanes, and Desulfothermus showed high relative abundance, corroborating their role in sulfate reduction and possible H2S generation in oilfield environments.


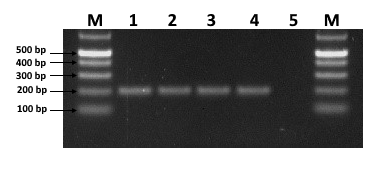


**Figure 3:** Agarose (2.0%) gel of real-time PCR amplification products of dsrB genes with five different samples. Lane M: Marker DNA; lane 1: D. desulfuricans; lane 2: D. vulgaris; lane 3: D. nigrificans; lane 4: Mixed culture from wastewater; lane 5: Negative control without DNA sample.

| 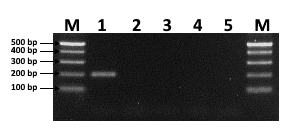 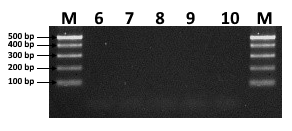 |
| --- |

**Figure 4: A.** Agarose (2.0%) gel of PCR specificity test of the BRS-DsrB-F and BRS-DsrB-R primers with five different samples. Lane M—Marker DNA; lane 1 D. desulfuricans; lane 2 E. coli; lane 3 S. cholerasis; lane 4 P. aeruginosa; lane 5 S. epidermidis. **B.** Agarose (2.0%) gel of PCR specificity test of the BRS-DsrB-F and BRS-DsrB-R primers with five different samples. Lane M—Marker DNA; lane 6 S. aureus; lane 7 C. acnes; lane 8 S. gougerotii; lane 9 B. cepacia; lane 10 C. xerosis.

| 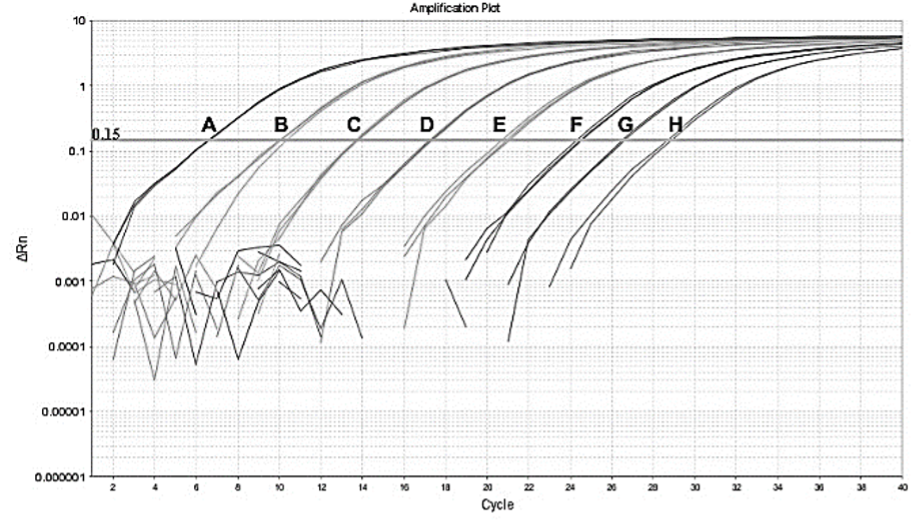 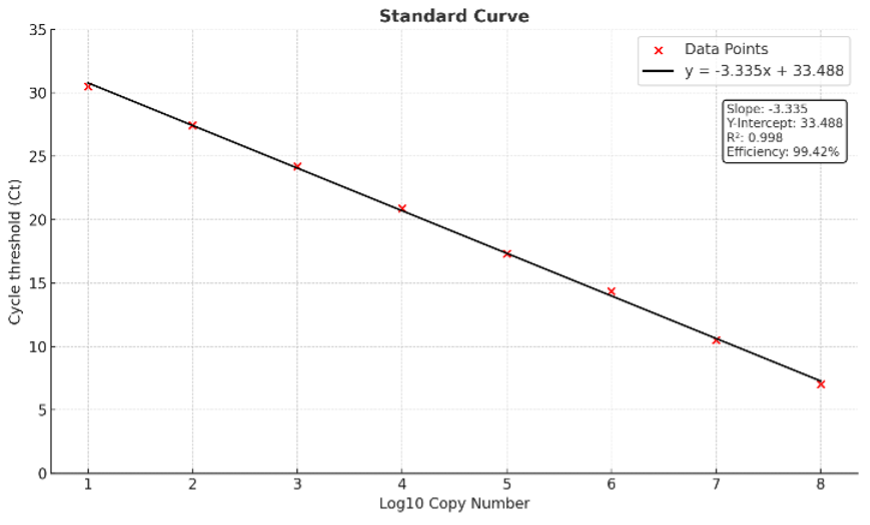 |
| --- |

**Figure 5:** The standard curve was obtained by plotting the concentration of D. desulfuricans gDNA using the primer set BRS-DsrB-F/BRS-DsrB-R for the dsrB gene.


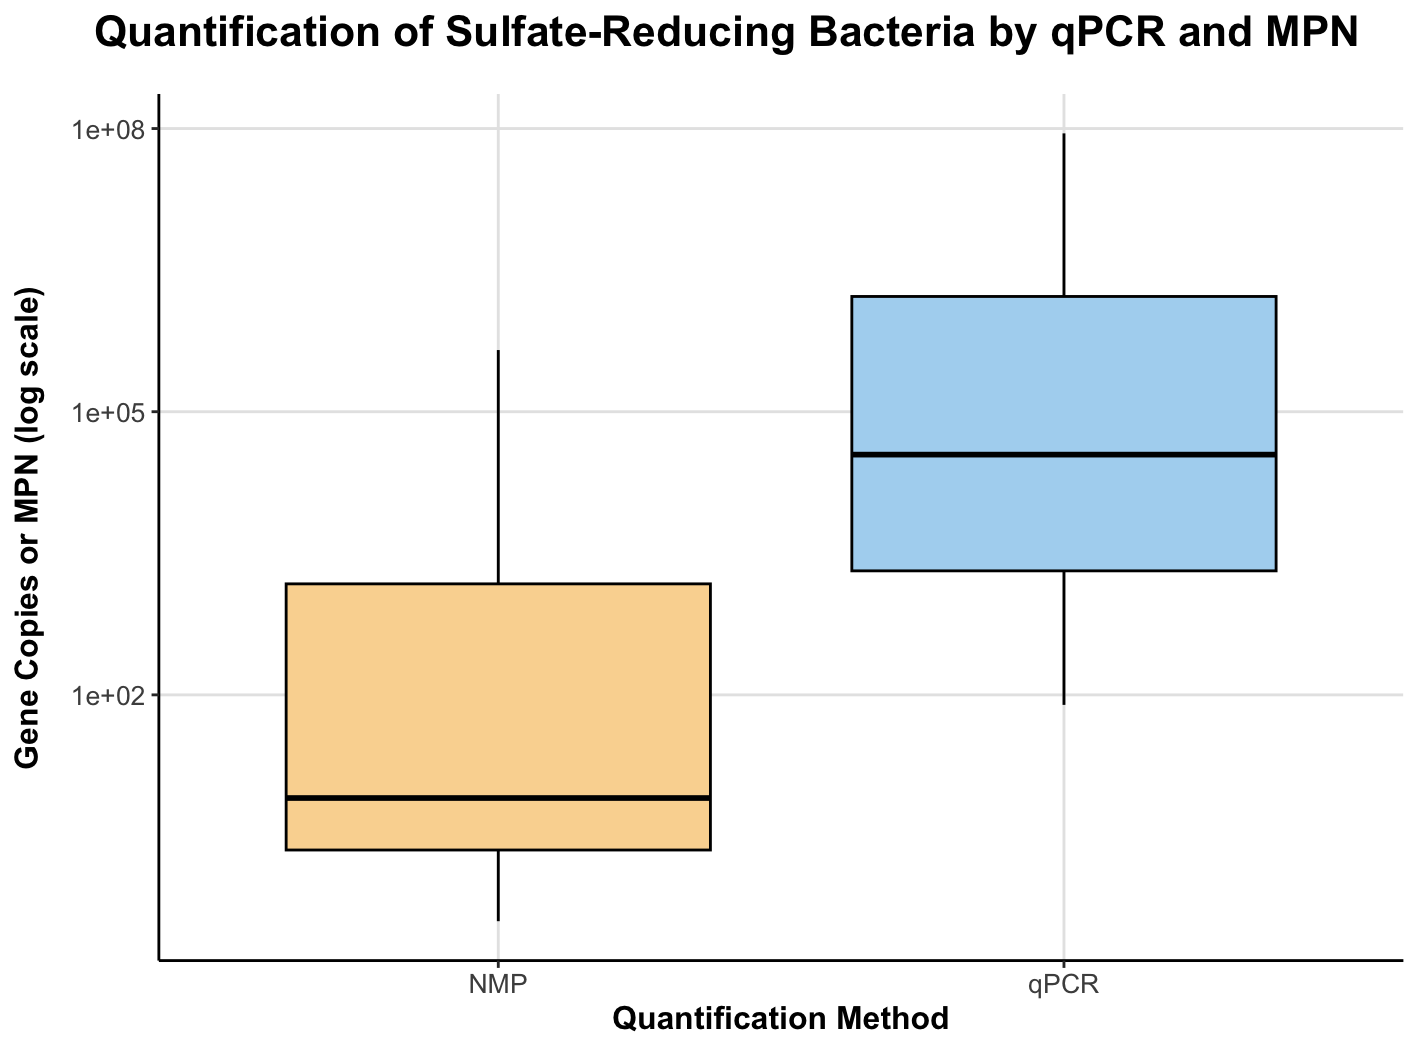


**Figure 6:** Distribution of SRB quantification results obtained by qPCR and MPN methods. The boxplot highlights the greater consistency and higher sensitivity of the qPCR method, which detects broader concentration ranges with less variability across replicates.

1. **Tables**

**Table 1:** Oligonucleotides used for real-time polymerase chain reaction (qPCR). (**F**) and (**R**), direct and reverse primers, respectively.

| **Primer name** | **Sequence 5’ - 3’** | **Primer binding site** | **Product size (bp)** |
| --- | --- | --- | --- |
| DsrB-F | TTG TGG GTA TCC ACC GCA A | 187–202 | 198 |
| DsrB-R | GGC ACA TGG TGT AGC AGT T | 391–408 |

**Table 2:** Comparison of the results of the quantification of planktonic bacteria in the inoculum samples, first day and after 30 days of testing by qPCR and MPN methodologies. The tests were carried out in technical triplicates and the average of the results was calculated.

| **Planktonic samples** | **qPCR (copies/mL)** | **MPN/mL** |
| --- | --- | --- |
| *D. desulfuricans* - Inoculum | 8,89E+07 | 9,50E+04 |
| *D. vulgaris* - Inoculum | 2,62E+07 | 2,50E+00 |
| *D. nigrificans* - Inoculum | 6,51E+04 | 0 |
| Produced water - Inoculum | 2,11E+04 | 4,50E+05 |
| *D. desulfuricans* – 1st day | 5,01E+07 | 2,50E+03 |
| *D. vulgaris* - 1st day | 1,27E+07 | 2,50E+00 |
| *D. nigrificans* - 1st day | 2,60E+02 | 0 |
| Produced water - 1st day | 1,48E+03 | 4,50E+03 |
| *D. desulfuricans* – 30 days | 2,29E+07 | 2,17E+00 |
| *D. vulgaris* - 30 days | 2,38E+07 | 1,07E+01 |
| *D. nigrificans* - 30 days | 1,51E+03 | 0 |
| Produced water - 30 days | 6,14E+04 | 1,15E+03 |

**Table 3:** Comparison of the results of the quantification of sessile bacteria after 30 days of testing by qPCR and MPN methodologies. The tests were carried out in technical triplicates and the average of the results was calculated.

| **Sessile samples** | **qPCR (copies/mL)** | **MPN/mL** |
| --- | --- | --- |
| *D. desulfuricans* - 30 days | 7,77E+05 | 2,17E+00 |
| *D. vulgaris* - 30 days | 1,01E+04 | 7,59E+00 |
| *D. nigrificans* - 30 days | 1,35E+02 | 0,00E+00 |
| Produced water - 30 days | 1,08E+04 | 0,00E+00 |

1. **Annex**

**Annex 1** – Sanger sequencing of the pGEM-BRS-DsrB plasmids.

**1 –** BRS-DsrB-F forward primer sequencing.

TCRGACTSMYASSSKYCTTCTTGAWTGSGATGGAGTTCACCTTGTTGCCGTTGTATTCCACCTTGGTGGGACGCACATTGGCGGTGGGGCAAGCAGAAACAGCCAAAGGAATTTCGTATAGYTGGWCAGCCCATTCGTGGTCGACCATCGGGGGC**TTGCGGTGGATACCCACAA**AATCACTAGTGAATTCGCGGCCSCCTGCAGGTCGACCATATGGGAGAGCTCCCAACGCGTTGGATGCATAGCTTGAGTATTCTATAGTGTCACCTAAATAGCTTGGCGTAATCATGGTCATAGCTGTTTCCTGTGTGAAATTGTTATCCGCTCACAATTCCACACAACATACGAGCCGGAAGCATAAAGTGTAAAGCCTGGGGTGCCTAATGAGTGAGCTAACTCACATTAATTGCGTTGCGCTCACTGCCCKCTTTCCWGTCGGGAAACCTGTCGTGCCMGCTGCWTTAWTTGAATCGGCCAACGCGCGGGGAGAGGCGGTTTGCGTATTGGGCGCTCTTCCGCTTCCTCGCTCACTGACTCGCTGCGCTCGGTCGTTCGGCTGCGGCGAGCGGTATCAGCTCACTCAAAGGCGGTAATACGGTTATCCCACAGAATCAGGGGATAACGCAGGAAAGAACATGTKAGCMAAAAGGCCAGCAAARGGCCAKGAACCCGTAAAAARGCCGCGTTGCTGGCGTTTTTTCCATAGGCTCCYGCCCCCYTGACGAGCATYACMAAAAWTCGACGYTCAWGTCARAGGKGGYSWAAACCCGAYAGGAYTATAAARAAWCCAGGGKTTCCCCCTKGRAWGYTCCCTTSTTSSGYTCTCYGTTCCYGACYCTGSCSCTTACCGGATAAYTGTCKSMCTTTCYTCCCTTCGGGAASMGKGSSCCTTYTCYCAWSCYMCRCGYGTMGSRMTCCCATTWCTGGKGTAGGWTGSTCGSYYMCAGCCTGGMSWGKGTGYGCACRAACMCCCCCGG

**2 –** BRS-DsrB-R reverse primer sequencing.

AGCWAACCRSAAWGGGGYTGACAGCTCTGCGAATTCCTTTGGCTGTTTCTGCTTGCCCCACCGCCGCTGTGAGAATGACCAAGGTGGAATACAACGGCAACAAGGTGAACTTATCGMCATCAAGGAAGACCGCTGCATGTACTGCGGT**AACTGCTACACCATGTGCC**AATCGAATTCCCGCGGCCGCCATGGCGGCCGGGAGCATGCGACGTCGGGCCCAATTCGCCCTATAGTGAGTCGTATTACAATTCACTGGCCGWCGTTTTACAACGTCGTGACTGGGAAAACCCTGGCGTTACCCAACTTAATCGCCTTGCAGCACATCCCCCTTTCGCCAGCTGGCGTAATAGCGAARAGGCCCGCACCGATCGCCCTTCCCAACAGTTGCGCAGCCTGAATGGCGAATGGACGCGCCCTGTAGYGGCKCATTAAGCGCGGCGGGYGTGGYGGTTACKCGCAGCGTGACCGCTACACTTGCCAGCGCCCTAGCGCCCGCTCCTTTCGCTTTCTTCCCTTCCTTTCTCGCCACGTTCGCCGGCTTTCCCCGTCAAGCTCTAAATCGGGGGCTCCCCTTTAGGGTTCCGATTTAGTGCTTTACGGCACCTCGACTCCWAAAAACTTGATTAGGGTGATGGGTCACGTAKTGGGCCATCSCCYTGAAGASGTTTTTCGCCCTTTGACKTRGAGTCCAMGTTYTTTAWASTGKACTCTTGGTCCAAACTGGAACAACACTCACCCTATCTCGGMCTWTTCTTTGRWTTATAAGGATTTGSCGATTTCGGCCTWWTGGTTAAAAAATGAWCTGATTWACAAAAATTTAACSGAATTTTMACAATATWACSCTTAMATGTCCTGTAKCGGAWTTWYCTCTTACSYWYGKCCGGAWCTTCCACCGMATCAGTGGACATTTCSGGRAAATKCGCSGRAMCCCCTATTTGTTRTTTTCCATC

**Annex 2** – qPCR amplification graphs of the microcosm assays extracted from the StepOnePlus™ software.


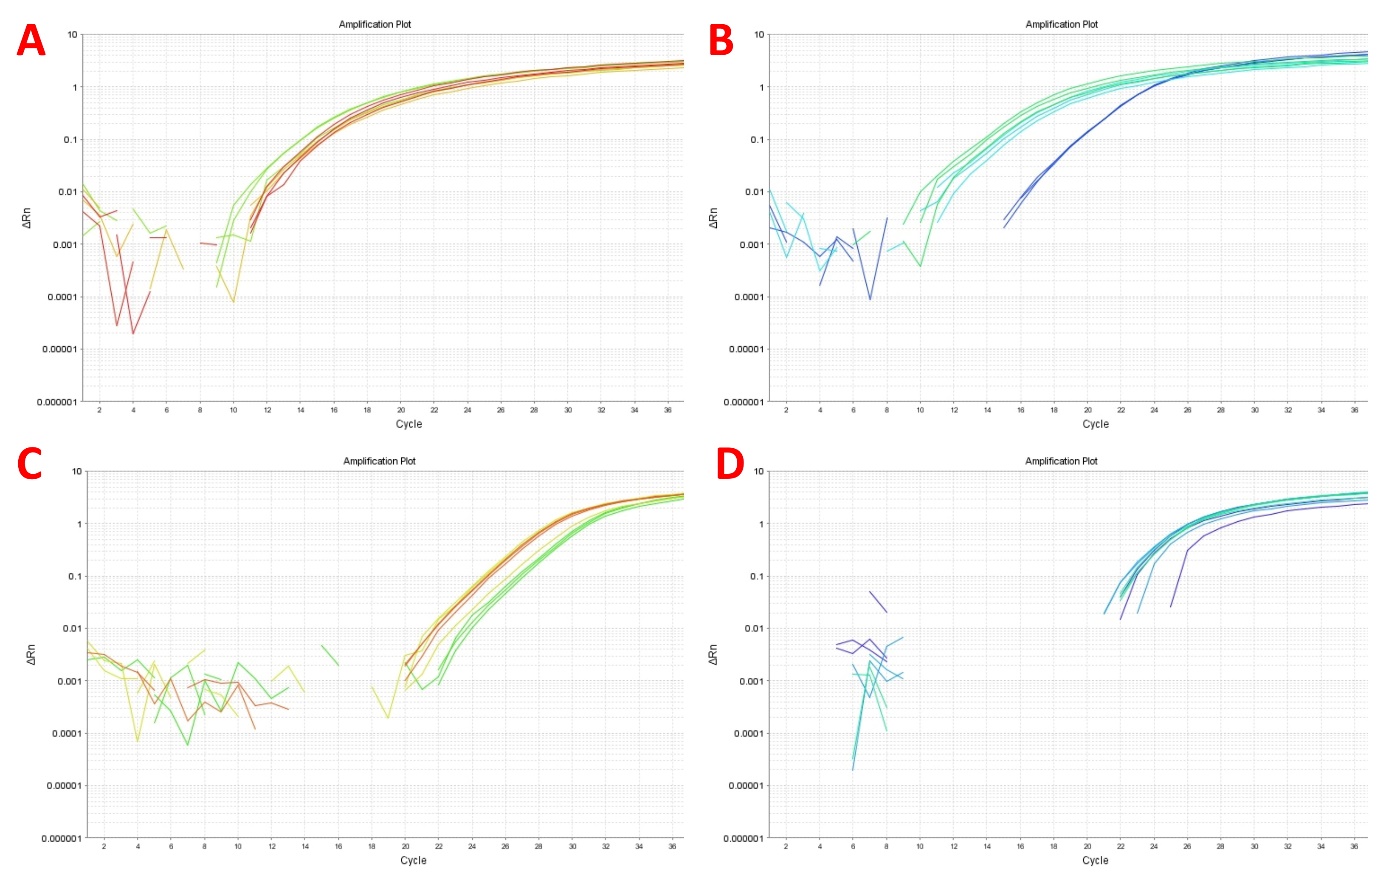


**1 –** Amplification of planktonic samples using primers BRS-DsrB-F1/BRS-DsrB-R1. **(a)** *D. desulfuricans*; **(b)** *D. vulgaris*; **(c)** *D. nigrificans*; **(d)** Mixed culture (P-40).


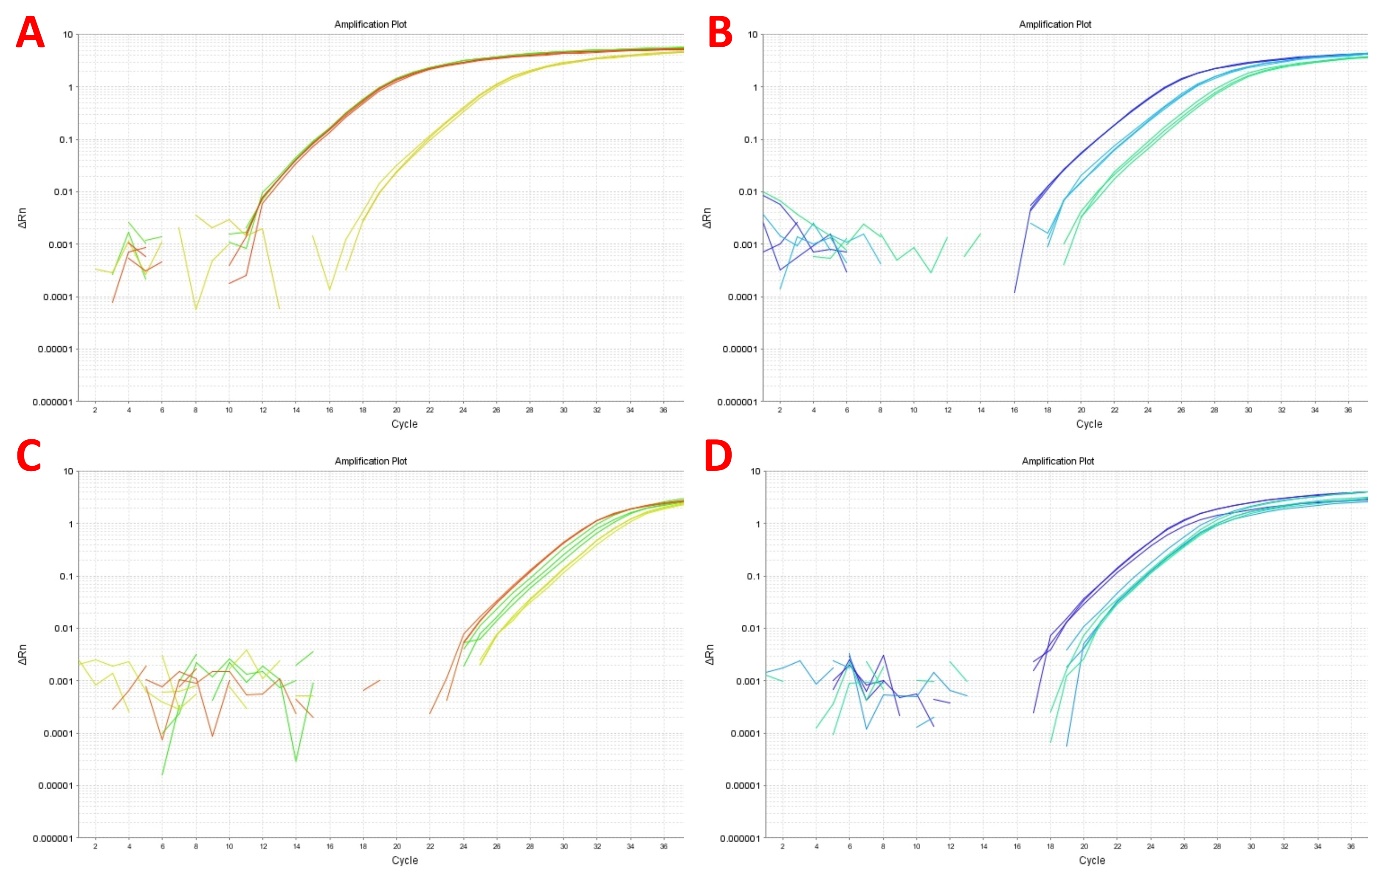


**2 –** Amplification of sessile samples using primers BRS-DsrB-F1/BRS-DsrB-R1. **(a)** *D. desulfuricans*; **(b)** *D. vulgaris*; **(c)** *D. nigrificans*; **(d)** Mixed culture (P-40).

**Annex 3** – Comparison between the primer sets developed in this work and the DSR1F/RH3-dsr-R primers from Ben-Dov et al., 2007.


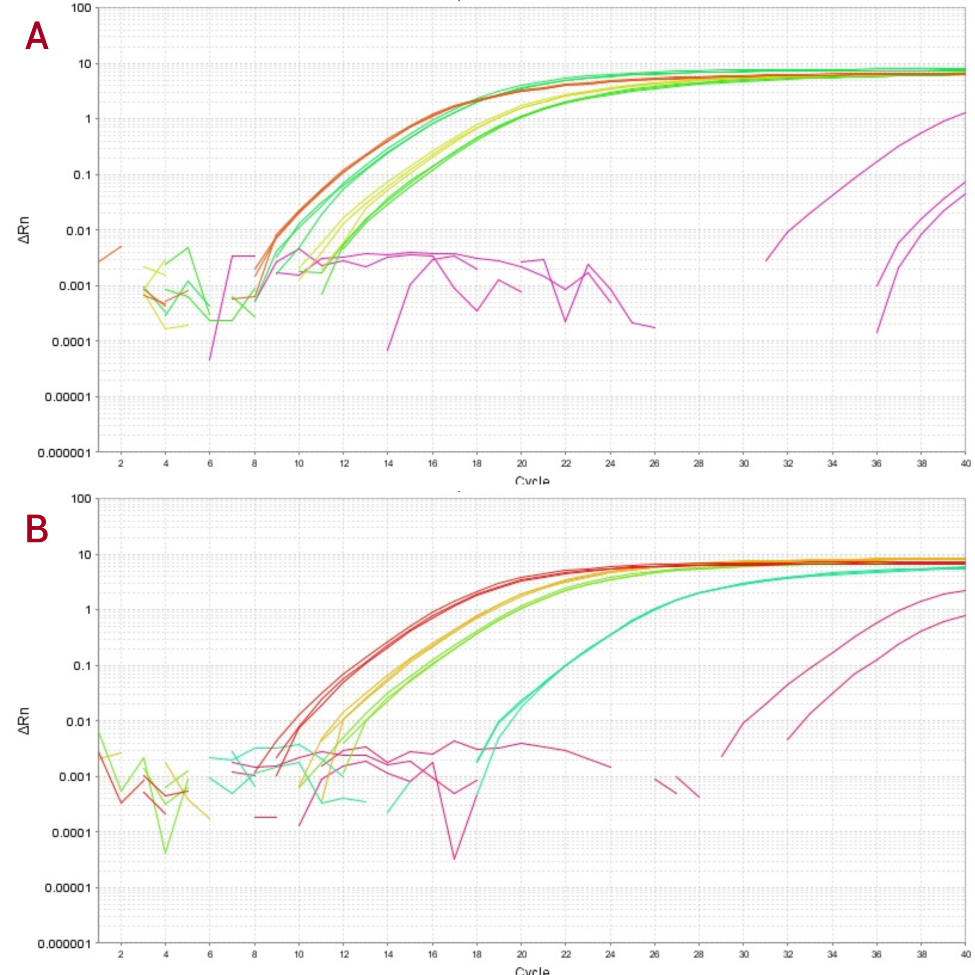


**A –** Amplification of planktonic samples using primers BRS-DsrB-F1/BRS-DsrB-R1. **B –** Amplification of planktonic samples using primers DSR1F/RH3-dsr-R from Ben-Dov et al., 2007.


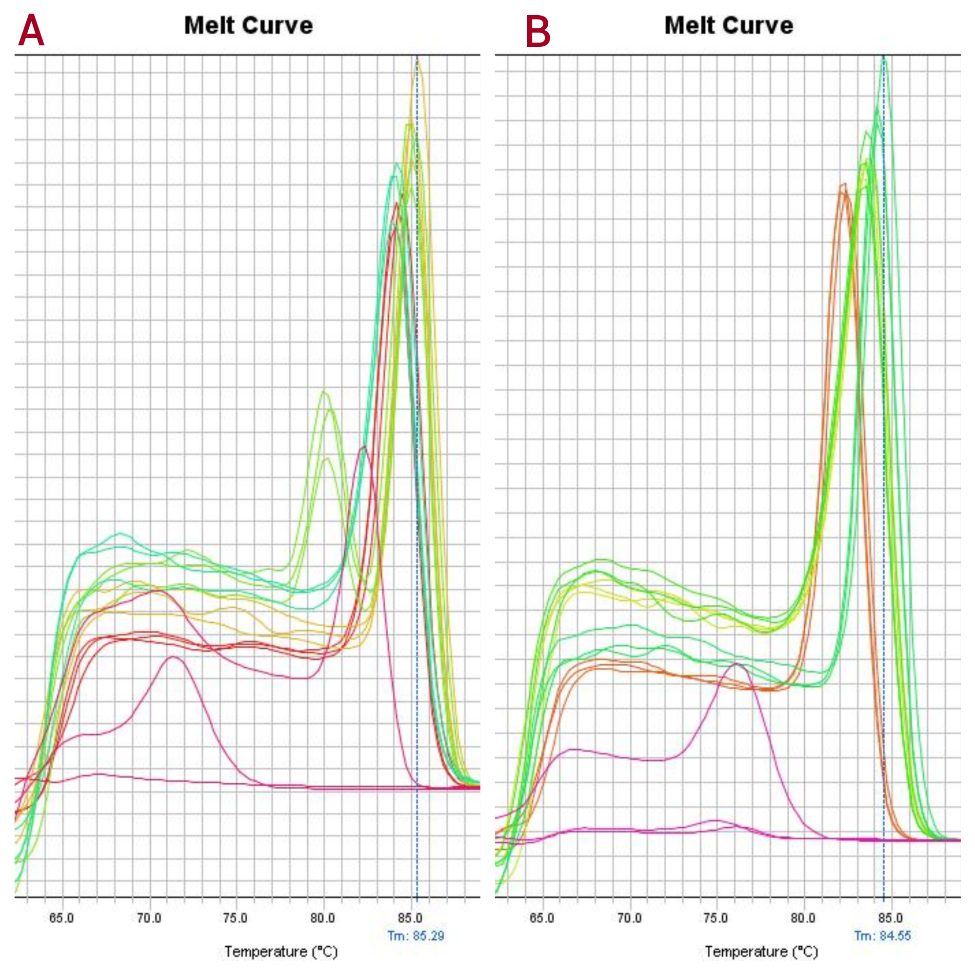


**A –** Melt curve of planktonic samples using primers BRS-DsrB-F1/BRS-DsrB-R1. **B –** Melt curve of planktonic samples using primers DSR1F/RH3-dsr-R from Ben-Dov et al., 2007.

**Annex 4** – Sequence comparisons with the qPCR primers for dsrB and the corresponding region of the genes of some BRS genera. The aligned colors indicate identical nucleotides in relation to those of the primers. No data available in nucleotide databases is represented by dashes.


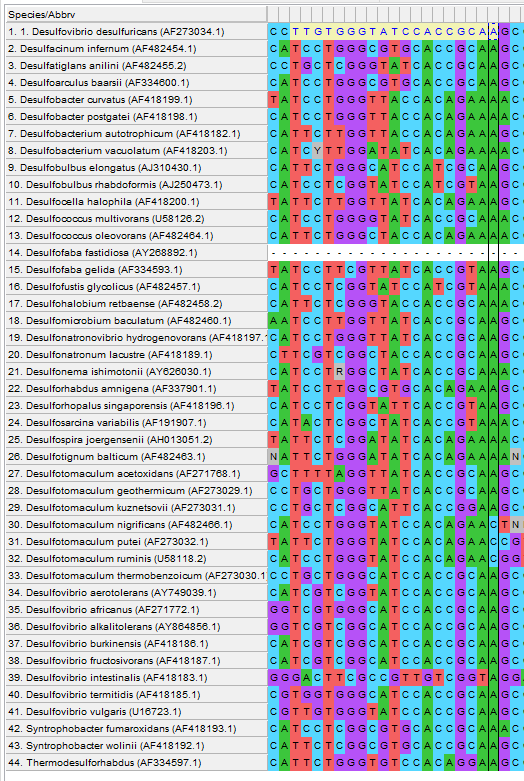


**Annex 5** – Standard curve of *D. desulfuricans* using the BRS-DsrB-F/BRS-DsrB-R primer set for the dsrB gene.


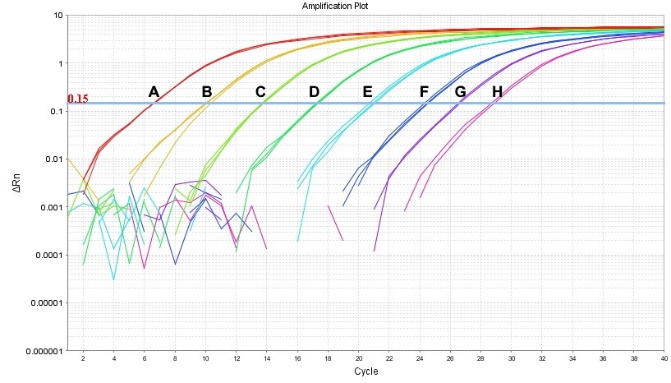

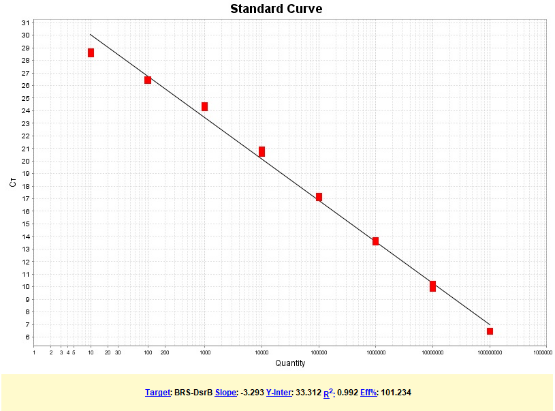

Supplement: Supplementary file 1 [file 387f9782bc5f4cb9786597e7.docx]
